# Supplementary material for: Effect of Delta variant on viral burden and vaccine effectiveness against new SARS-CoV-2 infections in the UK
Source: Springer Nature journal article supplement (doi:10.1038/s41591-021-01548-7), 2021-10-14
Supplement: 41591_2021_1548_MOESM1_ESM.pdf [file 41591_2021_1548_MOESM1_ESM.pdf]

---

**Supplementary information**

---

**Effect of Delta variant on viral burden and vaccine effectiveness against new SARS-CoV-2 infections in the UK**

---

In the format provided by the authors and unedited

**Supplementary Table 1: Characteristics of visits included in the analyses**

| <b>Characteristic</b>                                               | <b>1 Dec 2020-16 May 2021 (B.1.1.7-dominant)</b><br><br>≥18 years old<br><br><b>Total, n (%) or median (IQR)</b> | <b>17 May 2021 – 2 August (B.1.617.2-dominant)</b><br><br>≥18 years old<br><br><b>Total, n (%) or median (IQR)</b> | <b>17 May 2021 – 2 August (B.1.617.2-dominant)</b><br><br>18-34 years<br><br><b>Total, n (%) or median (IQR)</b> | <b>17 May 2021 – 2 August (B.1.617.2-dominant)</b><br><br>35-64 years<br><br><b>Total, n (%) or median (IQR)</b> |
|---------------------------------------------------------------------|------------------------------------------------------------------------------------------------------------------|--------------------------------------------------------------------------------------------------------------------|------------------------------------------------------------------------------------------------------------------|------------------------------------------------------------------------------------------------------------------|
| <b>Female</b>                                                       | 1,383,521 (53.6)                                                                                                 | 439,890 (54.2)                                                                                                     | 62,747 (54.6)                                                                                                    | 234,514 (55.8)                                                                                                   |
| <b>White ethnicity</b>                                              | 2,418,424 (93.7)                                                                                                 | 756,724 (93.2)                                                                                                     | 101,134 (87.9)                                                                                                   | 385,946 (91.9)                                                                                                   |
| <b>Age</b>                                                          | 56 (41,68)                                                                                                       | 57 (42,69)                                                                                                         | 28 (23,32)                                                                                                       | 52 (44,58)                                                                                                       |
| <b>Region / country</b>                                             |                                                                                                                  |                                                                                                                    |                                                                                                                  |                                                                                                                  |
| London                                                              | 451,476 (17.5)                                                                                                   | 140,057 (17.3)                                                                                                     | 29,154 (25.3)                                                                                                    | 77,441 (18.4)                                                                                                    |
| North West England                                                  | 290,953 (11.3)                                                                                                   | 83,529 (10.3)                                                                                                      | 11,435 (9.9)                                                                                                     | 42,585 (10.1)                                                                                                    |
| North East England                                                  | 95,547 (3.7)                                                                                                     | 30,158 (3.7)                                                                                                       | 3,892 (3.4)                                                                                                      | 15,091 (3.6)                                                                                                     |
| Yorkshire                                                           | 204,631 (7.9)                                                                                                    | 69,546 (8.6)                                                                                                       | 9,105 (7.9)                                                                                                      | 36,058 (8.6)                                                                                                     |
| West Midlands                                                       | 187,801 (7.3)                                                                                                    | 62,202 (7.7)                                                                                                       | 8,843 (7.7)                                                                                                      | 31,657 (7.5)                                                                                                     |
| East Midlands                                                       | 158,924 (6.2)                                                                                                    | 50,893 (6.3)                                                                                                       | 6,943 (6.0)                                                                                                      | 26,228 (6.2)                                                                                                     |
| South East England                                                  | 322,740 (12.5)                                                                                                   | 106,483 (13.1)                                                                                                     | 12,721 (11.1)                                                                                                    | 55,197 (13.1)                                                                                                    |
| South West England                                                  | 199,878 (7.7)                                                                                                    | 56,290 (6.9)                                                                                                       | 5,966 (5.2)                                                                                                      | 27,392 (6.5)                                                                                                     |
| East England                                                        | 259,811 (10.1)                                                                                                   | 67,086 (8.3)                                                                                                       | 7,974 (6.9)                                                                                                      | 34,334 (8.2)                                                                                                     |
| Northern Ireland                                                    | 73,296 (2.8)                                                                                                     | 22,399 (2.8)                                                                                                       | 3,146 (2.7)                                                                                                      | 12,158 (2.9)                                                                                                     |
| Scotland                                                            | 211,833 (8.2)                                                                                                    | 73,518 (9.1)                                                                                                       | 9,841 (8.6)                                                                                                      | 38,064 (9.1)                                                                                                     |
| Wales                                                               | 123,131 (4.8)                                                                                                    | 49,463 (6.1)                                                                                                       | 6,003 (5.2)                                                                                                      | 23,914 (5.7)                                                                                                     |
| <b>Household size</b>                                               |                                                                                                                  |                                                                                                                    |                                                                                                                  |                                                                                                                  |
| 1                                                                   | 491,866 (19.1)                                                                                                   | 168,423 (20.8)                                                                                                     | 12,886 (11.2)                                                                                                    | 74,749 (17.8)                                                                                                    |
| 2                                                                   | 1,246,647 (48.3)                                                                                                 | 388,494 (47.9)                                                                                                     | 46,117 (40.1)                                                                                                    | 166,359 (39.6)                                                                                                   |
| 3                                                                   | 397,242 (15.4)                                                                                                   | 122,254 (15.1)                                                                                                     | 27,504 (23.9)                                                                                                    | 80,720 (19.2)                                                                                                    |
| 4                                                                   | 315,769 (12.2)                                                                                                   | 95,518 (11.8)                                                                                                      | 18,769 (16.3)                                                                                                    | 73,227 (17.4)                                                                                                    |
| 5+                                                                  | 128,497 (5.0)                                                                                                    | 36,935 (4.6)                                                                                                       | 9,747 (8.5)                                                                                                      | 25,064 (6.0)                                                                                                     |
| <b>Multigenerational household</b>                                  | 111,165 (4.3)                                                                                                    | 35,389 (4.4)                                                                                                       | 4,825 (4.2)                                                                                                      | 28,576 (6.8)                                                                                                     |
| <b>Rural-urban classification</b>                                   |                                                                                                                  |                                                                                                                    |                                                                                                                  |                                                                                                                  |
| Major urban                                                         | 915,065 (35.5)                                                                                                   | 292,442 (36)                                                                                                       | 53,528 (46.5)                                                                                                    | 156,941 (37.4)                                                                                                   |
| Urban city/town                                                     | 1,095,963 (42.5)                                                                                                 | 344,593 (42.5)                                                                                                     | 45,766 (39.8)                                                                                                    | 177,297 (42.4)                                                                                                   |
| Rural town                                                          | 279,076 (10.8)                                                                                                   | 86,148 (10.6)                                                                                                      | 8,470 (7.4)                                                                                                      | 42,239 (10.1)                                                                                                    |
| Rural village                                                       | 289,917 (11.2)                                                                                                   | 88,441 (10.9)                                                                                                      | 7,259 (6.3)                                                                                                      | 43,642 (10.4)                                                                                                    |
| <b>Deprivation centile (1 = most deprived, 10 = least deprived)</b> | 6 (3,8)                                                                                                          | 6 (3,8)                                                                                                            | 5 (3,7)                                                                                                          | 6 (3,8)                                                                                                          |
| <b>Ever reported to be a care home worker</b>                       | 30,050 (1.2)                                                                                                     | 9,266 (1.1)                                                                                                        | 1,742 (1.5)                                                                                                      | 6,739 (1.6)                                                                                                      |
| <b>Ever reported to be a person-facing healthcare worker</b>        | 66,238 (2.6)                                                                                                     | 20,850 (2.6)                                                                                                       | 4,134 (3.6)                                                                                                      | 15,219 (3.6)                                                                                                     |
| <b>Ever reported to be person-facing social care worker</b>         | 29,691 (1.2)                                                                                                     | 10,261 (1.3)                                                                                                       | 1,705 (1.5)                                                                                                      | 7,687 (1.8)                                                                                                      |

|                                                           |                  |                |                |                |
|-----------------------------------------------------------|------------------|----------------|----------------|----------------|
| <b>Ever reported to have a long-term health condition</b> | 722,819 (28.0)   | 231,416 (28.5) | 20,099 (17.5)  | 101,659 (24.2) |
| <b>Days since previous visit</b>                          |                  |                |                |                |
| >14 days                                                  | 1,772,532 (68.7) | 707,099 (87.1) | 97,880 (85.1)  | 367,294 (87.4) |
| <= 14 days                                                | 662,234 (25.7)   | 78,135 (9.6)   | 12,671 (11.0)  | 39,603 (9.4)   |
| Enrolment                                                 | 145,255 (5.6)    | 26,390 (3.3)   | 4,472 (3.9)    | 13,222 (3.1)   |
| <b>Smoking status</b>                                     |                  |                |                |                |
| Non-smoker                                                | 2,325,890 (90.2) | 731,654 (90.1) | 101,670 (88.4) | 370,618 (88.2) |
| Tobacco smoker                                            | 195,301 (7.6)    | 61,758 (7.6)   | 9,915 (8.6)    | 37,509 (8.9)   |
| Only vape                                                 | 58,830 (2.3)     | 18,212 (2.2)   | 3,438 (3.0)    | 11,992 (2.9)   |
| <b>Contact with hospital in last 28 days</b>              |                  |                |                |                |
| Missing (n)                                               | 34,645           | 2,607          | 369            | 1,320          |
| No                                                        | 1,995,000 (78.4) | 604,317 (74.7) | 84,146 (73.4)  | 312,112 (74.5) |
| Yes, I have                                               | 347,145 (13.6)   | 138,498 (17.1) | 17,817 (15.5)  | 71,921 (17.2)  |
| No, but someone in household has                          | 203,231 (8.0)    | 66,202 (8.2)   | 12,691 (11.1)  | 34,766 (8.3)   |
| <b>Contact with care home in last 28 days</b>             |                  |                |                |                |
| Missing (n)                                               | 42,063           | 3,628          | 527            | 1,821          |
| No                                                        | 2,452,588 (96.6) | 766,973 (94.9) | 108,837 (95.1) | 394,263 (94.3) |
| Yes, I have                                               | 49,649 (2.0)     | 26,407 (3.3)   | 2,722 (2.4)    | 15,791 (3.8)   |
| No, but someone in household has                          | 35,721 (1.4)     | 14,616 (1.8)   | 2,937 (2.6)    | 8,244 (2.0)    |

Note: analysis is based on visits rather than participants and restricted to those either being unvaccinated or vaccinated with ChAdOx1, BNT162b2 or mRNA-1273: factors above and vaccination exposure (detailed in **Supplementary Table 2**) could change over time

**Supplementary Table 2: Vaccination and previous infection status for visits included in analysis (18 years and older)**

|                                                                 | 1 Dec 2020 – 16 May 2021 (B.1.1.7-dominant)                                                                                                             |                                                                                                                                                  | 17 May 2021 – 2 August (B.1.617.2-dominant)                                                                                                             |                                                                                                                                                  |
|-----------------------------------------------------------------|---------------------------------------------------------------------------------------------------------------------------------------------------------|--------------------------------------------------------------------------------------------------------------------------------------------------|---------------------------------------------------------------------------------------------------------------------------------------------------------|--------------------------------------------------------------------------------------------------------------------------------------------------|
| <b>Vaccination and previous infection status</b>                | <b>No prior study or national testing programme swab-positive and no antibody positive</b><br><br><b>Number of visits (row %) [number of positives]</b> | <b>Prior study or national testing programme swab-positive or antibody positive</b><br><br><b>Number of visits (row %) [number of positives]</b> | <b>No prior study or national testing programme swab-positive and no antibody positive</b><br><br><b>Number of visits (row %) [number of positives]</b> | <b>Prior study or national testing programme swab-positive or antibody positive</b><br><br><b>Number of visits (row %) [number of positives]</b> |
| Not vaccinated, no prior positive, >21 days before vaccination  | 1,561,154 (100%) [14,440]                                                                                                                               | 0 (0%) [0]                                                                                                                                       | 27,135 (100%) [351]                                                                                                                                     | 0 (0%) [0]                                                                                                                                       |
| Not vaccinated, no prior positive, 1-21 days before vaccination | 220,749 (100%) [665]                                                                                                                                    | 0 (0%) [0]                                                                                                                                       | 16,754 (100%) [51]                                                                                                                                      | 0 (0%) [0]                                                                                                                                       |
| Vaccinated 0-20 days ago, ChAdOx1                               | 127,572 (95%) [293]                                                                                                                                     | 4,169 (5%) [11]                                                                                                                                  | 4,435 (92%) [4]                                                                                                                                         | 387 (8%) [0]                                                                                                                                     |
| Vaccinated 0-20 days ago, BNT162b2                              | 70,837 (98%) [419]                                                                                                                                      | 1,562 (2%) [6]                                                                                                                                   | 23,387 (90%) [175]                                                                                                                                      | 2,496 (10%) [10]                                                                                                                                 |
| Vaccinated 0-20 days ago, mRNA-1273                             | NA                                                                                                                                                      | NA                                                                                                                                               | 2,941 (91%) [19]                                                                                                                                        | 275 (9%) [1]                                                                                                                                     |
| ≥ 21 days after 1 <sup>st</sup> dose, no second dose ChAdOx1    | 236,306 (95%) [227]                                                                                                                                     | 11,390 (5%) [11]                                                                                                                                 | 64,232 (91%) [194]                                                                                                                                      | 6,377 (9%) [20]                                                                                                                                  |
| ≥ 21 days after 1 <sup>st</sup> dose, no second dose, BNT162b2  | 141,968 (96%) [278]                                                                                                                                     | 5,259 (4%) [11]                                                                                                                                  | 38,505 (91%) [410]                                                                                                                                      | 3,998 (9%) [12]                                                                                                                                  |
| ≥ 21 days after 1 <sup>st</sup> dose, no second dose, mRNA-1273 | NA                                                                                                                                                      | NA                                                                                                                                               | 5,710 (91%) [30]                                                                                                                                        | 534 (9%) [2]                                                                                                                                     |
| 0-13 days after second dose ChAdOx1                             | 32,239 (95%) [14]                                                                                                                                       | 1,657 (5%) [2]                                                                                                                                   | 44,879 (91%) [91]                                                                                                                                       | 4,429 (9%) [1]                                                                                                                                   |
| 0-13 days after second dose, BNT162b2                           | 34,406 (96%) [28]                                                                                                                                       | 1,542 (4%) [0]                                                                                                                                   | 11,146 (90%) [40]                                                                                                                                       | 1,184 (10%) [1]                                                                                                                                  |

|                                       |                   |                    |                       |                   |
|---------------------------------------|-------------------|--------------------|-----------------------|-------------------|
| ≥ 14 days after second dose ChAdOx1   | 30,178 (95%) [9]  | 1,562 (5%) [1]     | 303,511 (92%) [1,175] | 27,166 (8%) [61]  |
| ≥ 14 days after second dose, BNT162b2 | 70,058 (96%) [39] | 3,231 (4%) [4]     | 199,411 (93%) [422]   | 16,166 (7%) [25]  |
| Not vaccinated, prior positive        | 0 (0%) [0]        | 24,256 (100%) [80] | 0 (0%) [0]            | 5,753 (100%) [25] |

Note: analysis is based on visits rather than participants: factors (**Table S1**) and vaccination exposure could change over time. See methods for definition of PCR-positive episodes of infection and prior positivity. Cells with zeros only are by definition. NA indicates too few visits to estimate effectiveness.

**Supplementary Table 3. Vaccine effectiveness (VE) (95% CI) for single mRNA-1273 dose in those 18 to 64 years in the B.1.617.2-dominant period.**

| <b>Vaccine effectiveness (95% CI)</b> | <b>mRNA-1273:<br/>one dose <math>\geq</math>21<br/>days</b> |
|---------------------------------------|-------------------------------------------------------------|
| All infections                        | 75% (64% - 83%)                                             |
| Ct<30                                 | 77% (67% - 84%)                                             |
| Self-reported symptoms                | 77% (66% - 84%)                                             |
| Ct $\geq$ 30                          | 67% (53% - 77%)                                             |
| No self-reported symptoms             | 70% (57% - 79%)                                             |

Note: see **Table 2** for VE for other vaccines.

**Supplementary Table 4. Comparisons between vaccines and with previous infection (unadjusted heterogeneity p-values) in those aged 18 years and older in B.1.1.7-dominant and B.1.617.2-dominant periods.**

|                                    | BNT162b2 vs ChAdOx1: one dose $\geq 21$ days | BNT162b2 vs ChAdOx1: second dose 0-13 days ago | BNT162b2 vs ChAdOx1: second dose $\geq 14$ days | BNT162b2: second dose $\geq 14$ days vs not vaccinated, previously positive* | ChAdOx1: second dose $\geq 14$ days vs not vaccinated, previously positive* | BNT162b2: second dose $\geq 14$ days vs one dose $\geq 21$ days | ChAdOx1: second dose $\geq 14$ days vs one dose $\geq 21$ days |
|------------------------------------|----------------------------------------------|------------------------------------------------|-------------------------------------------------|------------------------------------------------------------------------------|-----------------------------------------------------------------------------|-----------------------------------------------------------------|----------------------------------------------------------------|
| <b>All infections</b>              |                                              |                                                |                                                 |                                                                              |                                                                             |                                                                 |                                                                |
| 1 Dec 2020 – 16 May 2021 (B.1.1.7) | 0.34                                         | 0.54                                           | 0.85                                            |                                                                              |                                                                             | 0.0007                                                          | 0.12                                                           |
| 17 May 2021- (B.1.617.2)           | 0.01                                         | 0.01                                           | <0.0001                                         | 0.12                                                                         | 0.38                                                                        | <0.0001                                                         | <0.0001                                                        |
| <b>Ct&lt;30</b>                    |                                              |                                                |                                                 |                                                                              |                                                                             |                                                                 |                                                                |
| 1 Dec 2020 – 16 May 2021 (B.1.1.7) | 0.08                                         | 0.44                                           | 0.03                                            |                                                                              |                                                                             | <0.0001                                                         | 0.10                                                           |
| 17 May 2021- (B.1.617.2)           | 0.003                                        | 0.02                                           | <0.0001                                         | 0.09                                                                         | 0.15                                                                        | <0.0001                                                         | <0.0001                                                        |
| <b>Self-reported symptoms</b>      |                                              |                                                |                                                 |                                                                              |                                                                             |                                                                 |                                                                |
| 1 Dec 2020 – 16 May 2021 (B.1.1.7) | 0.93                                         | 0.04                                           | 0.52                                            |                                                                              |                                                                             | <0.0001                                                         | <0.0001                                                        |
| 17 May 2021- (B.1.617.2)           | 0.0001                                       | <0.0001                                        | <0.0001                                         | 0.59                                                                         | 0.01                                                                        | <0.0001                                                         | <0.0001                                                        |

Note: Calendar time split into two epochs when the majority of cases detected in the survey were ORF1ab+N positive (B.1.1.7-compatible) and then when triple positives became dominant (B.1.617.2-compatible) (**Extended Data Fig. 1**). P-values were obtained using two-sided Wald test without adjustment for multiple comparisons.

**Supplementary Table 5. Comparisons between vaccines and with previous infection (unadjusted heterogeneity p-values) in those aged 18 to 64 years in the B.1.617.2-dominant period**

|                                    | BNT162b2 vs ChAdOx1: one dose ≥21 days | BNT162b2 vs ChAdOx1: second dose 0-13 days ago | BNT162b2 vs ChAdOx1: second dose ≥14 days | BNT162b2: second dose ≥14 days vs not vaccinated, previously positive* | ChAdOx1: second dose ≥14 days vs not vaccinated, previously positive* | BNT162b2: second dose ≥14 days vs one dose ≥21 days | ChAdOx1: second dose ≥14 days vs one dose ≥21 days |
|------------------------------------|----------------------------------------|------------------------------------------------|-------------------------------------------|------------------------------------------------------------------------|-----------------------------------------------------------------------|-----------------------------------------------------|----------------------------------------------------|
| All infections (Figure 1A)         | 0.001                                  | 0.006                                          | <0.0001                                   | 0.04                                                                   | 0.33                                                                  | <0.0001                                             | <0.0001                                            |
| Ct<30 (Figure 1B)                  | 0.0003                                 | 0.02                                           | <0.0001                                   | 0.02                                                                   | 0.12                                                                  | <0.0001                                             | <0.0001                                            |
| Self-reported symptoms (Figure 1C) | <0.0001                                | <0.0001                                        | <0.0001                                   | 0.33                                                                   | 0.01                                                                  | <0.0001                                             | <0.0001                                            |
| Ct≥30                              | 0.03                                   | 0.0002                                         | <0.0001                                   | 0.07                                                                   | 0.81                                                                  | <0.0001                                             | <0.0001                                            |
| No self-reported symptoms          | 0.24                                   | 0.27                                           | <0.0001                                   | 0.003                                                                  | 0.49                                                                  | <0.0001                                             | 0.05                                               |

Note: Calendar time split into two epochs when the majority of cases detected in the survey were ORF1ab+N positive (B.1.1.7-compatible) and then when triple positives became dominant (B.1.617.2-compatible) (**Extended Data Fig. 1**).



**Supplementary Table 6: Vaccine effectiveness by subgroups during the B.1.617.2-dominant period in those aged 18-64 years**

|                                                          | VE against all infections      |                             |                              | VE against infections with Ct<30 |                             |                              | VE against infections with reported symptoms |                             |                              |
|----------------------------------------------------------|--------------------------------|-----------------------------|------------------------------|----------------------------------|-----------------------------|------------------------------|----------------------------------------------|-----------------------------|------------------------------|
|                                                          | No evidence of prior infection | Evidence of prior infection | Heterogeneity p-value        | No evidence of prior infection   | Evidence of prior infection | Heterogeneity p-value        | No evidence of prior infection               | Evidence of prior infection | Heterogeneity p-value        |
| <b>By evidence of prior infection</b>                    |                                |                             |                              |                                  |                             |                              |                                              |                             |                              |
| ≥21 days after 1st dose, no second vaccination BNT162b2  | 57% (50-63%)                   | 91% (84-95%)                | <0.0001                      | 62% (54-68%)                     | 96% (88-98%)                | <0.0001                      | 58% (50-65%)                                 | 94% (87-98%)                | <0.0001                      |
| ≥21 days after 1st dose, no second vaccination ChAdOx1   | 43% (30-54%)                   | 53% (24-71%)                | 0.45                         | 45% (30-57%)                     | 78% (49-90%)                | 0.03                         | 34% (16-48%)                                 | 83% (55-94%)                | 0.007                        |
| ≥21 days after 1st dose, no second vaccination mRNA-1273 | 76% (64-83%)                   | 86% (44-97%)                | 0.43                         | 76% (62-85%)                     | 100% (100-100%)             | <0.0001                      | 76% (62-85%)                                 | 100% (100-100%)             | <0.0001                      |
| 14 days after 2nd dose BNT162b2                          | 85% (79-90%)                   | 93% (87-96%)                | 0.006                        | 92% (87-95%)                     | 98% (94-99%)                | 0.004                        | 93% (89-97%)                                 | 99% (96-100%)               | 0.002                        |
| 14 days after 2nd dose ChAdOx1                           | 68% (61-73%)                   | 88% (83-92%)                | <0.0001                      | 69% (61-75%)                     | 92% (87-95%)                | <0.0001                      | 72% (64-78%)                                 | 94% (89-97%)                | <0.0001                      |
| <b>By age</b>                                            | <b>Aged 18-34 years old</b>    | <b>Aged 35-64 years old</b> | <b>Heterogeneity p-value</b> | <b>Aged 18-34 years old</b>      | <b>Aged 35-64 years old</b> | <b>Heterogeneity p-value</b> | <b>Aged 18-34 years old</b>                  | <b>Aged 35-64 years old</b> | <b>Heterogeneity p-value</b> |
| ≥21 days after 1st dose, no second vaccination BNT162b2  | 64% (57-70%)                   | 36% (14-53%)                | 0.0009                       | 68% (60-74%)                     | 46% (22-62%)                | 0.01                         | 66% (58-72%)                                 | 32% (0-53%)                 | 0.002                        |

|                                                          | VE against all infections             |                                    |                              | VE against infections with Ct<30      |                                    |                              | VE against infections with reported symptoms |                                    |                              |
|----------------------------------------------------------|---------------------------------------|------------------------------------|------------------------------|---------------------------------------|------------------------------------|------------------------------|----------------------------------------------|------------------------------------|------------------------------|
| ≥21 days after 1st dose, no second vaccination ChAdOx1   | 43% (11-64%)                          | 18% (-9-39%)                       | 0.18                         | 57% (21-77%)                          | 22% (-9-45%)                       | 0.10                         | 37% (-7% -63%)                               | 0% (-43-31%)                       | 0.16                         |
| ≥21 days after 1st dose, no second vaccination mRNA-1273 | 82% (70-89%)                          | 56% (23-75%)                       | 0.02                         | 81% (66-90%)                          | 64% (27-83%)                       | 0.18                         | 85% (72-92%)                                 | 48% (-1-73%)                       | <b>0.008</b>                 |
| 14 days after 2nd dose BNT162b2                          | 90% (85-93%)                          | 77% (65-85%)                       | <b>0.0001</b>                | 95% (91-97%)                          | 88% (79-93%)                       | <b>0.002</b>                 | 96% (93-98%)                                 | 88% (78-94%)                       | <b>&lt;0.0001</b>            |
| 14 days after 2nd dose ChAdOx1                           | 73% (65-80%)                          | 54% (40-65%)                       | <b>0.002</b>                 | 74% (64-81%)                          | 57% (41-69%)                       | 0.02                         | 76% (67-83%)                                 | 57% (39-70%)                       | <b>0.007</b>                 |
| <b>By interval between first and second doses</b>        | <b>Dosing interval &lt;6 weeks</b>    | <b>Dosing interval ≥6 weeks</b>    | <b>Heterogeneity p-value</b> | <b>Dosing interval &lt;6 weeks</b>    | <b>Dosing interval ≥6 weeks</b>    | <b>Heterogeneity p-value</b> | <b>Dosing interval &lt;6 weeks</b>           | <b>Dosing interval ≥6 weeks</b>    | <b>Heterogeneity p-value</b> |
| 14 days after 2nd dose BNT162b2                          | 82% (72-88%)                          | 86% (80-90%)                       | 0.18                         | 90% (83-95%)                          | 93% (88-95%)                       | 0.30                         | 91% (83-95%)                                 | 94% (89-96%)                       | 0.13                         |
| <b>By self-reported long-term health conditions</b>      | <b>No long-term health conditions</b> | <b>Long-term health conditions</b> | <b>Heterogeneity p-value</b> | <b>No long-term health conditions</b> | <b>Long-term health conditions</b> | <b>Heterogeneity p-value</b> | <b>No long-term health conditions</b>        | <b>Long-term health conditions</b> | <b>Heterogeneity p-value</b> |
| ≥21 days after 1st dose, no second vaccination BNT162b2  | 58% (50-64%)                          | 62% (39-77%)                       | 0.65                         | 62% (54-69%)                          | 66% (40-80%)                       | 0.76                         | 58% (49-66%)                                 | 66% (40-81%)                       | 0.48                         |
| ≥21 days after 1st dose, no second vaccination ChAdOx1   | 45% (32-55%)                          | 7% (-48-41%)                       | 0.04                         | 46% (30-58%)                          | 28% (-27-59%)                      | 0.35                         | 38% (19-52%)                                 | 5% (-66-46%)                       | 0.18                         |

|                                                          | VE against all infections |               |      | VE against infections with Ct<30 |               |      | VE against infections with reported symptoms |              |      |
|----------------------------------------------------------|---------------------------|---------------|------|----------------------------------|---------------|------|----------------------------------------------|--------------|------|
| ≥21 days after 1st dose, no second vaccination mRNA-1273 | 77% (65-84%)              | 59% (-17-85%) | 0.31 | 78% (65-87%)                     | 59% (-35-88%) | 0.33 | 80% (66-88%)                                 | 44 (-61-81%) | 0.09 |
| 14 days after 2nd dose BNT162b2                          | 86% (80-90%)              | 81% (69-89%)  | 0.23 | 92% (87-95%)                     | 92% (85-96%)  | 0.96 | 94% (89-96%)                                 | 92% (84-96%) | 0.38 |
| 14 days after 2nd dose ChAdOx1                           | 69% (62-74%)              | 58% (39-71%)  | 0.10 | 70% (62-76%)                     | 65% (46-77%)  | 0.48 | 73% (65-79%)                                 | 64% (44-77%) | 0.23 |

Note: obtained using a model with logit-linear slopes on time since ≥14 days after second ChAdOx1 or BNT162b2 vaccination. The effect estimates in the table relate to the effectiveness on the 14<sup>th</sup> day after the second dose ('intercept' of the second dose effect). Potential waning of effectiveness as a function of time since ≥14 days after the second vaccination is obtained from the same model by including logit-linear time terms for BNT162b2 and ChAdOx1 that are not varied by subgroup due to insufficient numbers to estimate different slopes by the combination of vaccine type and subgroup effects (potential waning effects shown in **Figure 2, Extended Data Fig. 4 & 5**). P-values<0.01 shown in bold (0.01 threshold used given the number of tests performed). P-values were obtained using two-sided Wald test without adjustment for multiple comparison.

**Supplementary Table 7: Median (IQR) Ct values in all new PCR-positives**

|                                                                  | <b>B.1.1.7-dominant period</b>     |        |                                   |                                   | <b>Early B.1.617.2-dominant period</b> |        |                                   |                                   | <b>Late B.1.617.2-dominant period</b> |        |                                   |                                   |
|------------------------------------------------------------------|------------------------------------|--------|-----------------------------------|-----------------------------------|----------------------------------------|--------|-----------------------------------|-----------------------------------|---------------------------------------|--------|-----------------------------------|-----------------------------------|
|                                                                  | <b>1 December 2020-16 May 2021</b> |        |                                   |                                   | <b>17 May-13 June 2021</b>             |        |                                   |                                   | <b>17 May-13 June 2021</b>            |        |                                   |                                   |
|                                                                  | N                                  | Median | lower 25 <sup>th</sup> percentile | upper 75 <sup>th</sup> percentile | N                                      | Median | lower 25 <sup>th</sup> percentile | upper 75 <sup>th</sup> percentile | N                                     | Median | lower 25 <sup>th</sup> percentile | upper 75 <sup>th</sup> percentile |
| Not vaccinated                                                   | 10853                              | 28.7   | 20.4                              | 32.9                              | 75                                     | 21.5   | 16.4                              | 31.7                              | 326                                   | 25.7   | 19.1                              | 30.8                              |
| 0-20 days of first dose                                          | 733                                | 31.0   | 22.8                              | 33.7                              | 24                                     | 30.0   | 21.9                              | 34.2                              | 185                                   | 25.6   | 21.6                              | 30.9                              |
| ≥21 days after first dose or <14 days after 2 <sup>nd</sup> dose | 577                                | 31.6   | 26.6                              | 33.7                              | 110                                    | 30.1   | 18.6                              | 33.7                              | 705                                   | 24.7   | 18.8                              | 31.3                              |
| ≥14 days after 2nd dose                                          | 56                                 | 33.3   | 31.6                              | 34.0                              | 104                                    | 32.2   | 26.0                              | 34.0                              | 1593                                  | 25.3   | 19.1                              | 31.3                              |
| Reinfection before vaccination                                   | 68                                 | 32.8   | 30.9                              | 34.2                              | 5                                      | 30.8   | 29.5                              | 34.3                              | 20                                    | 22.3   | 16.5                              | 30.3                              |

**Supplementary Table 8: Independent associations with Ct values in new PCR-positives  $\geq 14$  days after second vaccination 18 years and older**

|                                                     | Low Ct vs high Ct:<br>odds of class membership |                  |                   | Low Ct sub-population: mean<br>Ct |                    |                   | High Ct sub-population: mean<br>Ct |                    |                   | Het low<br>vs high<br>mean |
|-----------------------------------------------------|------------------------------------------------|------------------|-------------------|-----------------------------------|--------------------|-------------------|------------------------------------|--------------------|-------------------|----------------------------|
|                                                     | OR                                             | 95% CI           | p                 | Effect                            | 95% CI             | p                 | Effect                             | 95% CI             | p                 |                            |
| Overall mean Ct                                     |                                                |                  |                   | <b>+21.2</b>                      | <b>+18.5,+23.8</b> | <b>&lt;0.0001</b> | <b>33.0</b>                        | <b>+32.4,+33.5</b> | <b>&lt;0.0001</b> | <0.0001                    |
| Per month post 1 Jan 2021 (reference 27 April) 2021 | <b>1.76</b>                                    | <b>1.41,2.20</b> | <b>&lt;0.0001</b> | <b>Fig S5C</b>                    |                    | <b>0.0002</b>     | <b>Fig S5C</b>                     |                    | <b>0.0004</b>     |                            |
| Vaccine: 14 days post second dose                   |                                                |                  |                   |                                   |                    |                   |                                    |                    |                   |                            |
| ChAdOx1                                             | 1.00 (ref)                                     |                  | -                 | 0.0 (ref)                         |                    | -                 | 0.0 (ref)                          |                    | -                 |                            |
| BNT162b2                                            | <b>0.33</b>                                    | <b>0.16,0.67</b> | <b>0.002</b>      | <b>+4.0</b>                       | <b>+1.4,+6.6</b>   | <b>0.003</b>      | +0.5                               | -0.2,+1.2          | 0.16              | 0.008                      |
| Vaccine: per month later post second dose           |                                                |                  |                   |                                   |                    |                   |                                    |                    |                   |                            |
| ChAdOx1                                             | 0.97                                           | 0.79,1.19        | 0.78              | -0.2                              | -0.8,+0.3          | 0.45              | -0.1                               | -0.3,+0.2          | 0.66              | 0.58                       |
| BNT162b2                                            | <b>1.43</b>                                    | <b>1.07,1.91</b> | <b>0.01</b>       | <b>-1.6</b>                       | <b>-2.5,-0.6</b>   | <b>0.002</b>      | -0.0                               | -0.3,+0.3          | 0.82              | 0.01                       |
| Previously PCR/antibody-positive                    | <b>0.35</b>                                    | <b>0.21,0.57</b> | <b>&lt;0.0001</b> |                                   |                    | <i>0.58</i>       |                                    |                    | <i>0.10</i>       |                            |
| Report having a long-term health condition          | <b>0.69</b>                                    | <b>0.53,0.90</b> | <b>0.006</b>      |                                   |                    | <i>0.78</i>       |                                    |                    | <i>0.52</i>       |                            |
| Sex: Male                                           |                                                |                  | <i>0.34</i>       | 0.0 (ref)                         |                    | -                 | 0.0 (ref)                          |                    | -                 |                            |
| Female                                              |                                                |                  | -                 | +0.0                              | -0.7,+0.7          | 0.98              | <b>+0.3</b>                        | <b>+0.0,+0.6</b>   | <b>0.04</b>       | 0.39                       |
| Age                                                 |                                                |                  | <i>0.19</i>       |                                   |                    | <i>0.24</i>       |                                    |                    | <i>0.64</i>       |                            |
| Ethnicity (white vs non-white)                      |                                                |                  | <i>0.96</i>       |                                   |                    | <i>0.65</i>       |                                    |                    | <i>0.85</i>       |                            |
| Patient facing healthcare worker                    |                                                |                  | <i>0.63</i>       |                                   |                    | <i>0.90</i>       |                                    |                    | <i>0.28</i>       |                            |
| Deprivation percentile                              |                                                |                  | <i>0.60</i>       |                                   |                    | <i>0.94</i>       |                                    |                    | <i>0.91</i>       |                            |
| Interval between first and second dose              |                                                |                  | <i>0.83</i>       |                                   |                    | <i>0.64</i>       |                                    |                    | <i>0.16</i>       |                            |

Note: where effect size not shown (gray cells), p-values in italics show the additional effect of adding this term into the model for either class membership or for and effect on mean Ct in the two sub-populations. Test for interaction between effect of vaccine type and time since second dose:  $p=0.02$  for membership of high vs low Ct sub-population,  $p=0.01$  for low mean Ct,  $p=0.89$  for high mean Ct. Excluding 17 positives occurring  $\geq 14$  days after second vaccination but not reporting either two ChAdOx1 or two BNT162b2 doses. There was no evidence of interaction between vaccine type and age for class probability ( $p=0.09$ ) or mean Ct ( $p>0.1$ ); nor was there evidence of interaction between vaccine type and date for class probability ( $p=0.69$ ) or mean Ct ( $p>0.4$ ). P-values were obtained using two-sided Wald test without adjustment for multiple comparisons.
